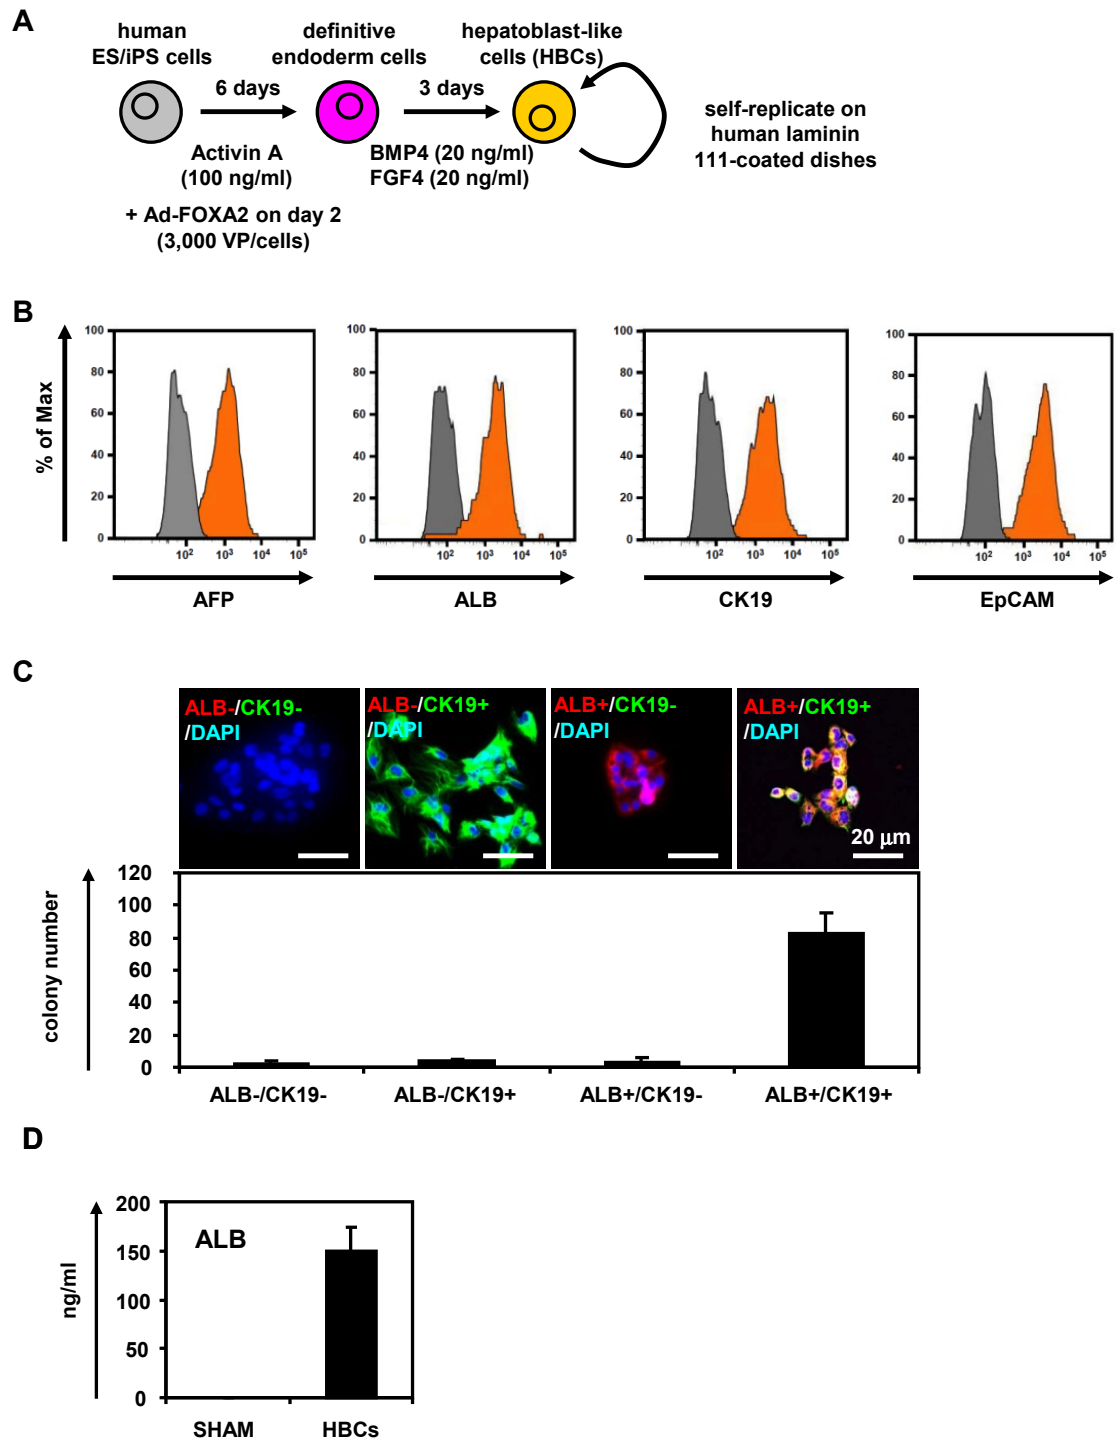

**Fig. S1 The hepatoblast-like cells (HBCs) generated from hESCs were characterized.**

(A) hESCs were differentiated into the HBCs via definitive endoderm cells. The HBCs were maintained on human LN111. (B) The expression levels of hepatoblast markers (AFP, ALB, CK19, and EpCAM) in the HBCs were examined by FACS

analysis. **(C)** Clonal assay of the HBC was performed. The HBCs were plated at a density of 200 cells/cm<sup>2</sup> on human LN111-coated 96-well plates. The colonies were separated into four groups based on the expression of ALB and CK19 (ALB and CK19 double-negative, ALB negative and CK19 positive, ALB positive and CK19 negative, and ALB and CK19 double-positive groups). The numbers represent wells in which the colony was observed in three 96-well plates (total 288 wells). Five days after plating, the cells were fixed with 4% PFA and used for double immunostaining. Nuclei were counterstained with DAPI (blue). **(D)** The HBCs were transplanted into CCl<sub>4</sub> (2 mL/kg)-treated Rag2/IL2 receptor gamma double-knockout mice. The human ALB level in recipient mouse serum was measured at 2 weeks after transplantation.

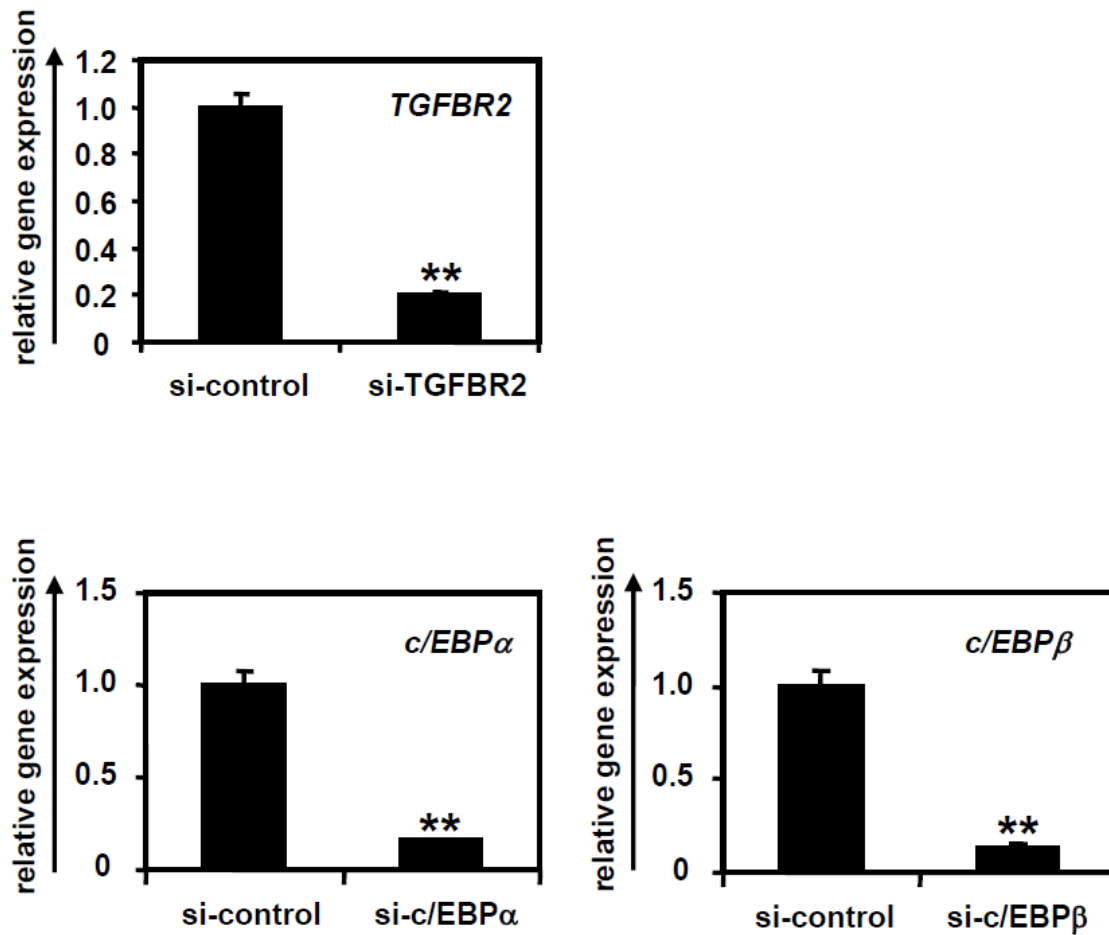

**Fig. S2** *c/EBP $\alpha$* , *c/EBP $\beta$* , or *TGFBR2* were knocked-down in the HBCs by si-c/EBP $\alpha$ , si-c/EBP $\beta$ , or si-TGFBR2 transfection, respectively.

The HBCs were transfected with 50 nM of si-control, si-c/EBP $\alpha$ , si-c/EBP $\beta$ , or si-TGFBR2. Two days after transfection, the gene expression levels of *c/EBP $\alpha$* , *c/EBP $\beta$* , or *TGFBR2* were examined by real-time RT-PCR in si-c/EBP $\alpha$ -, si-c/EBP $\beta$ -, or si-TGFBR2-transfected cells, respectively. On the y axis, the gene expression levels of *c/EBP $\alpha$* , *c/EBP $\beta$* , or *TGFBR2* in si-control-transfected cells were taken as 1.0. \*\* $P < 0.01$  (compared with the si-control-transfected cells).

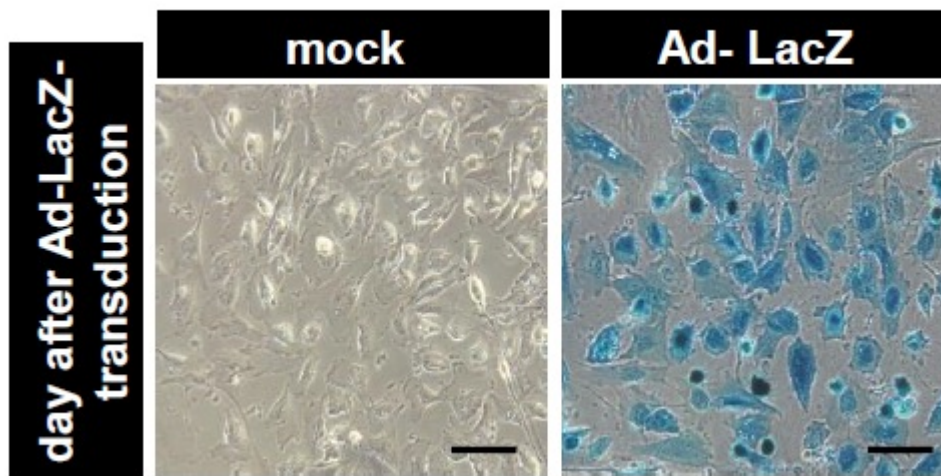

**Fig. S3 Ad vectors efficiently transduced the HBCs.**

The HBCs were transduced with 3,000 VP/cell of Ad-LacZ for 1.5 hr. The day after transduction, X-gal staining was performed. The scale bars represent 50  $\mu\text{m}$ .

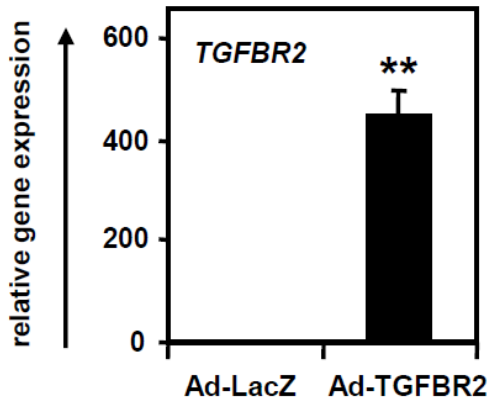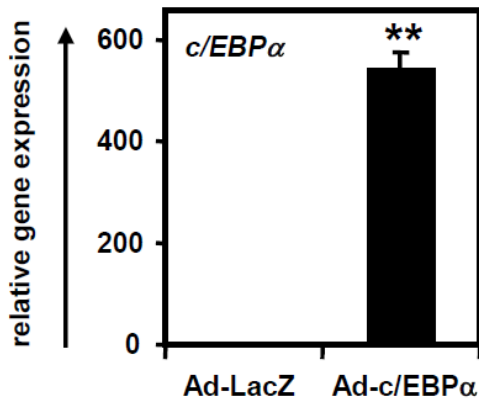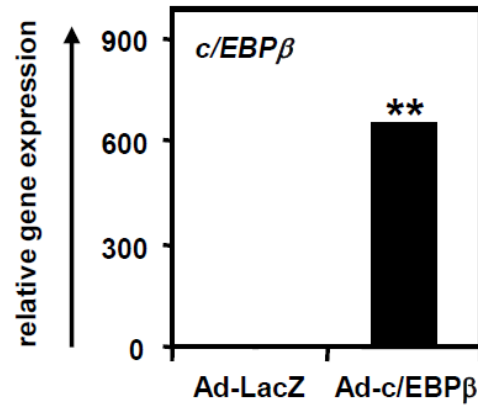

**Fig. S4** *c/EBPα*, *c/EBPβ*, or *TGFBR2* were overexpressed in the HBCs by Ad-*c/EBPα*, Ad-*c/EBPβ*, or Ad-*TGFBR2* transduction, respectively.

The HBCs were transduced with 3,000 VP/cells of Ad-*c/EBPα*, Ad-*c/EBPβ*, or Ad-*TGFBR2* for 1.5 hr. Two days after Ad vectors transduction, the gene expression levels of *c/EBPα*, *c/EBPβ*, or *TGFBR2* were examined by real-time RT-PCR in Ad-*c/EBPα*-, Ad-*c/EBPβ*-, or Ad-*TGFBR2*-transduced cells, respectively. On the y axis, the gene expression levels of *c/EBPα*, *c/EBPβ*, or *TGFBR2* in Ad-LacZ-transduced cells were taken as 1.0. \*\* $P < 0.01$  (compared with the Ad-LacZ-transfected cells).

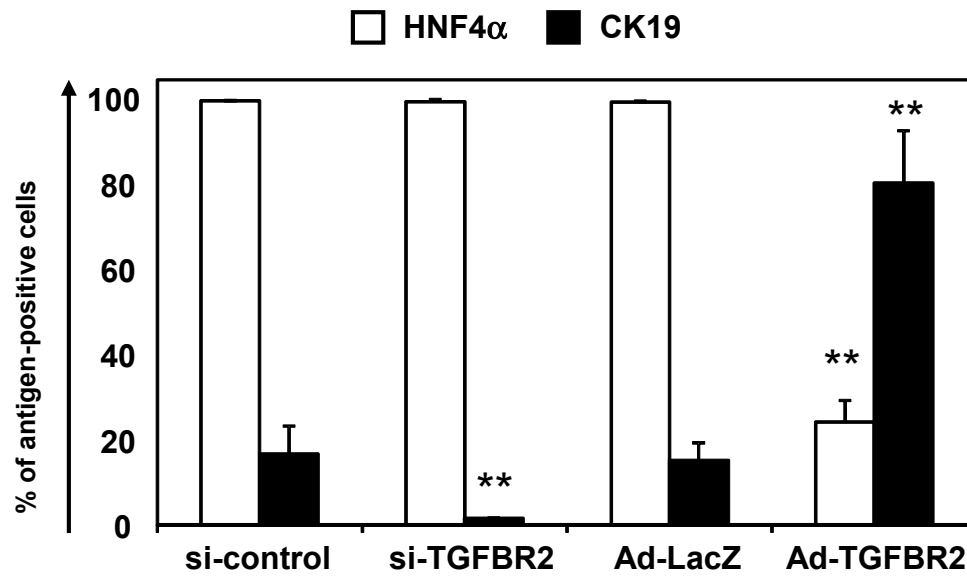

**Fig. S5 TGFBR2 overexpression or knockdown in the HBCs promotes cholangiocyte or hepatocyte differentiation, respectively.**

The si-control-, si-TGFBR2-, Ad-LacZ- or Ad-TGFBR2-transduced HBCs (total of  $1.0 \times 10^6$  cells) were transplanted into CCl<sub>4</sub> (2 mL/kg)-treated Rag2/IL2 receptor gamma double knockout mice by intrasplenic injection. Expressions of HNF4 $\alpha$  and CK19 were examined by immunohistochemistry at 2 weeks after transplantation. Semiquantitative analysis of the immunofluorescent staining was performed in the human cell clusters. \* $P < 0.05$ ; \*\* $P < 0.01$ .

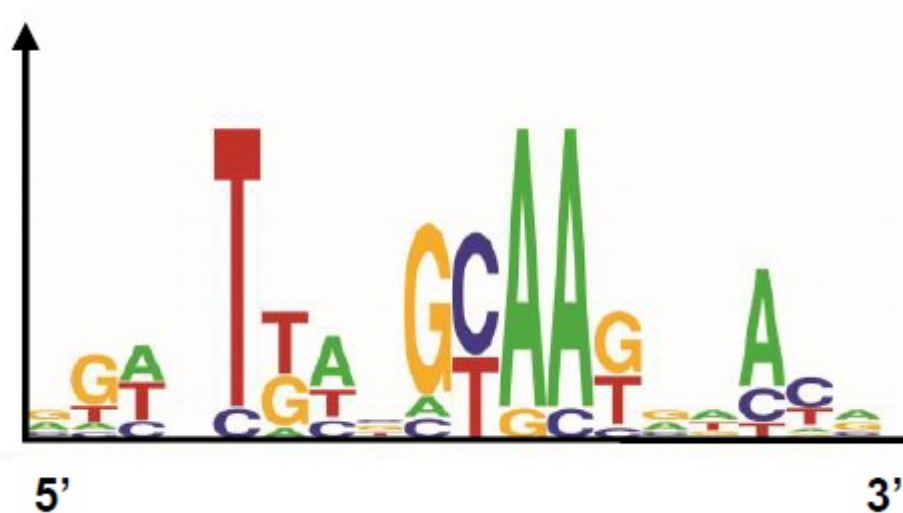

**Fig. S6 c/EBP-binding site on the TGFR2 promoter region**

The consensus sequence of the c/EBP-binding site is described. (<http://www.cbil.upenn.edu/cgi-bin/tess/tess>).

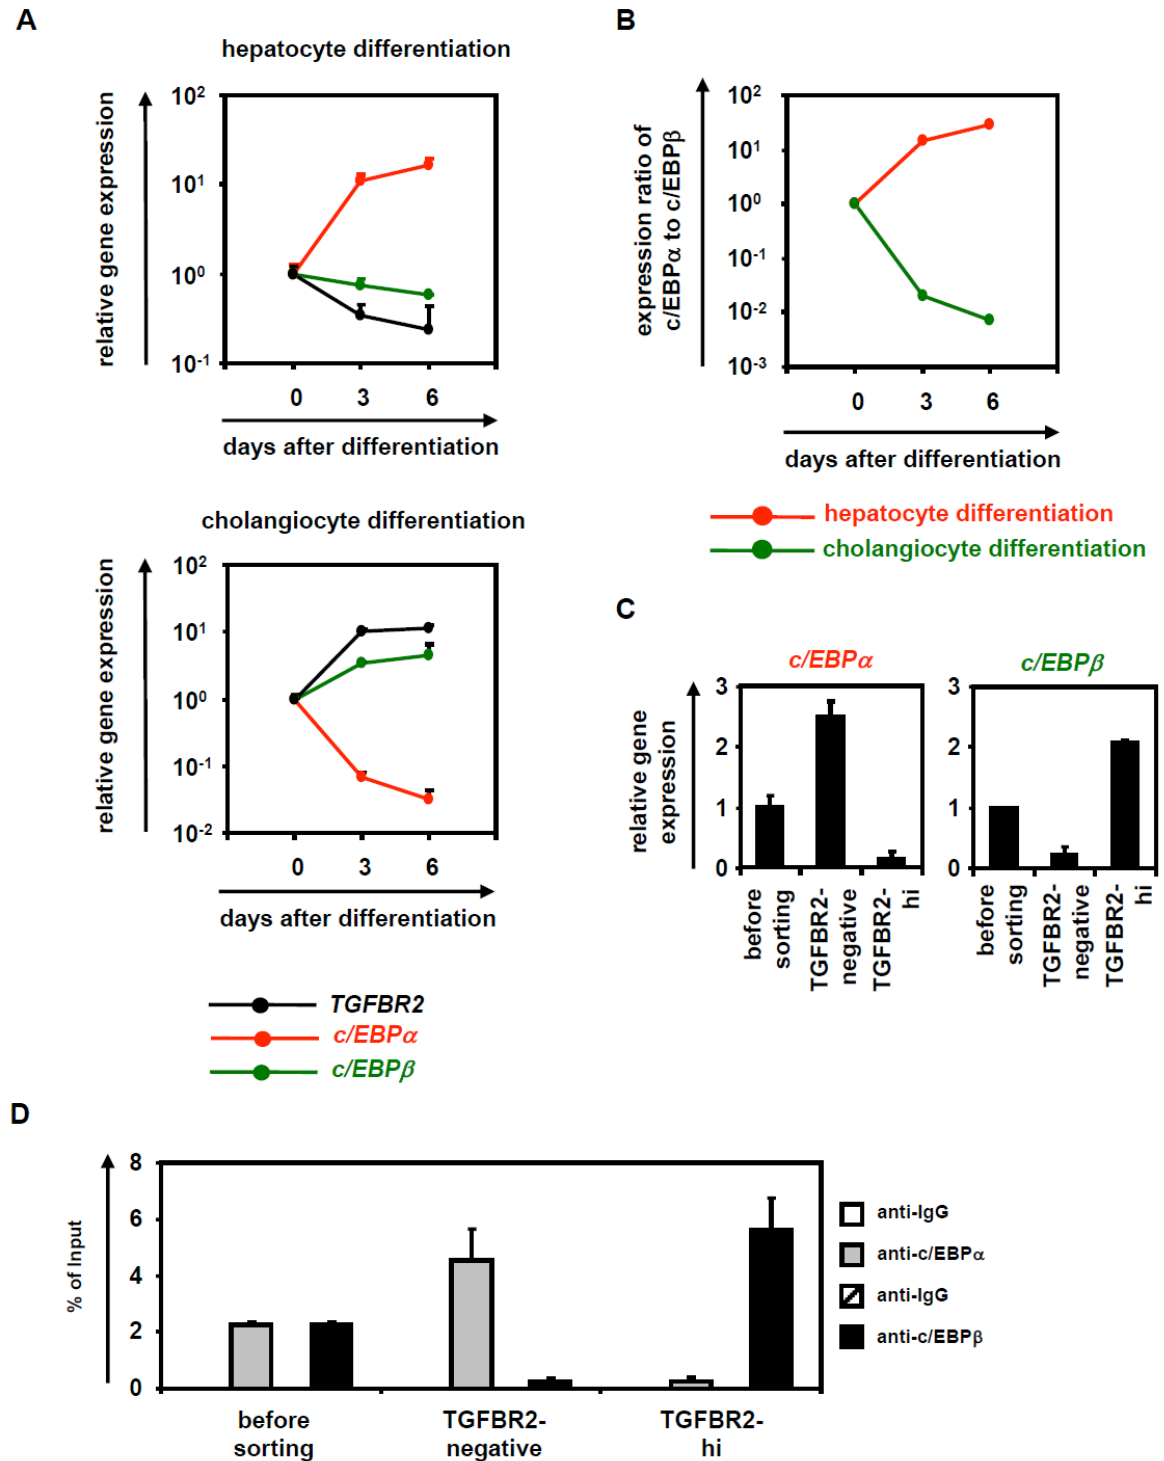

**Fig. S7** Temporal gene expression levels of *TGFBR2*, *c/EBPα*, and *c/EBPβ* in hepatocyte and choangiocyte differentiation.

The HBCs were differentiated into hepatocyte-like cells or choangiocyte-like cells as shown in figure 1A. (A) Temporal gene expression levels of *TGFBR2*,



*c/EBPα*, and *c/EBPβ* in hepatocyte differentiation and cholangiocyte differentiation of the HBCs were examined by real-time RT-PCR. On the y axis, the gene expression levels in the HBCs were taken as 1.0. **(B)** The temporal ratio of *c/EBPα* to *c/EBPβ* was demonstrated in hepatocyte and cholangiocyte differentiation. The ratio of *c/EBPα* to *c/EBPβ* in the HBCs was taken as 1.0. **(C)** The HBCs were cultured on Matrigel for 5 days, and then the expression level of TGFBR2 was examined by FACS analysis. TGFBR2-negative, -lo, and -hi populations were collected as described in figure 1F. Real-time RT-PCR analysis was performed in three populations (before sorting, TGFBR-negative, and TGFBR2-hi) to measure the expression levels of *c/EBPα* and *c/EBPβ*. **(D)** The recruitment of *c/EBPα* or *c/EBPβ* to the TGFBR2 promoter region in three populations (before sorting, TGFBR-negative, and TGFBR2-hi) was examined by ChIP assay.

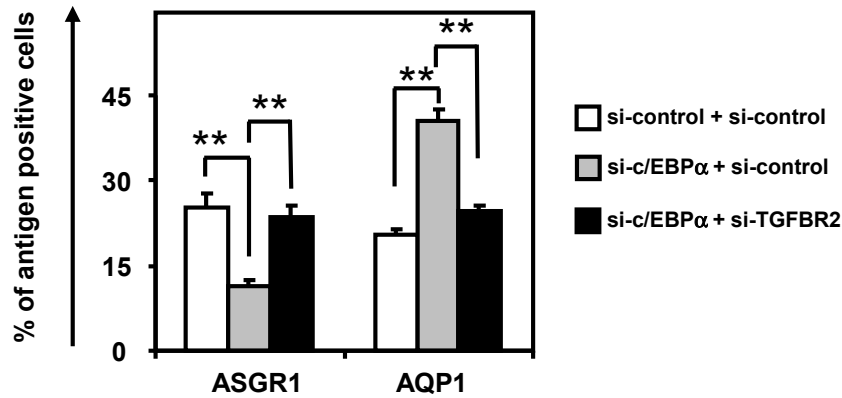

**Fig. S8 Inhibition of hepatocyte differentiation by si-c/EBPα transfection was rescued by si-TGFBR2 transfection.**

The HBCs were transfected with 50 nM of each of si-control + si-control, si-c/EBPα + si-control, or si-c/EBPα + si-TGFBR2 and cultured with the differentiation hESF-DIF medium for 10 days. The efficiency of hepatocyte or cholangiocyte differentiation was measured by estimating the percentage of ASGR1- or AQP1-positive cells, respectively, using FACS analysis. \* $P < 0.05$ ; \*\* $P < 0.01$ .

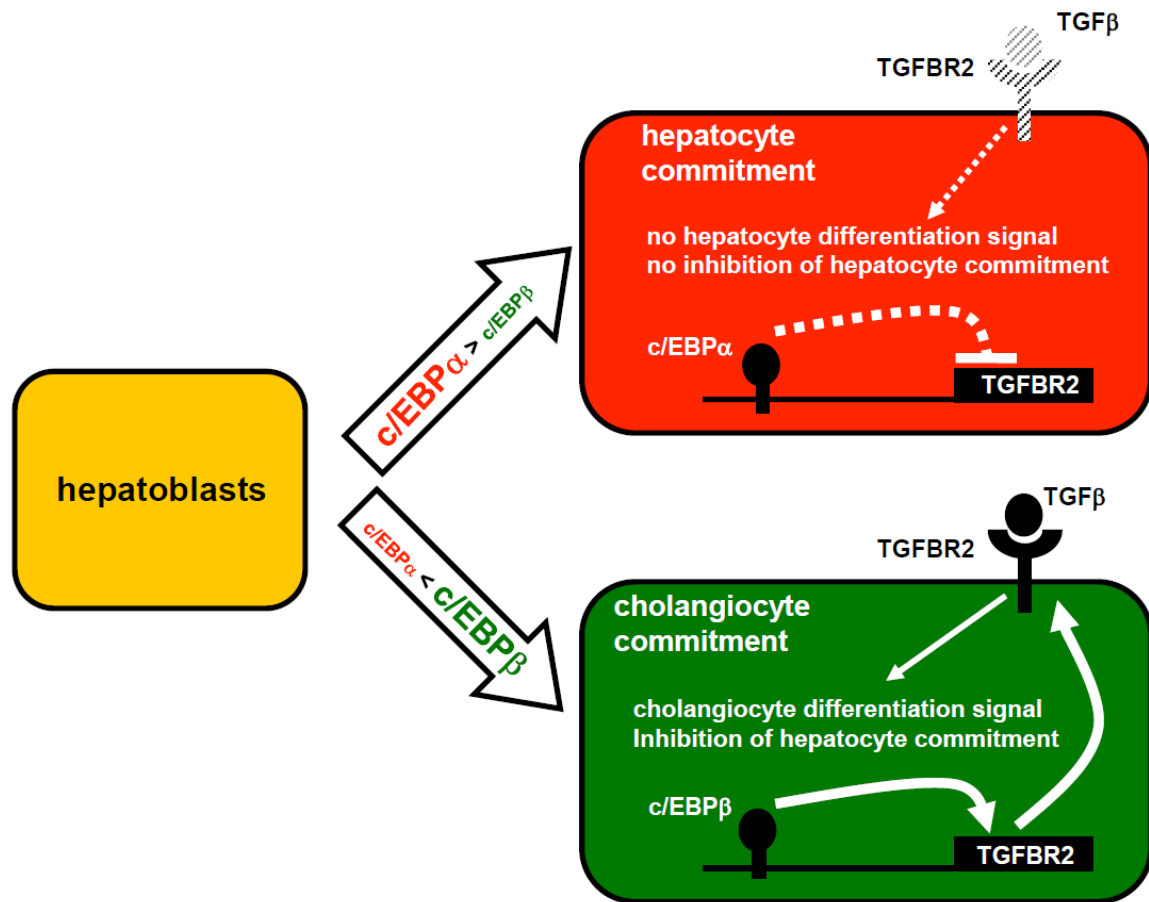

**Fig. S9 The lineage segregation of hepatoblasts might be explained by c/EBP-mediated control of TGFBR2 expression.**

In hepatocyte differentiation from hepatoblasts, c/EBPα promotes hepatocyte differentiation via negative regulation of TGFBR2 expression. On the other hand, c/EBPβ promotes cholangiocyte differentiation via positive regulation of TGFBR2 expression in cholangiocyte differentiation.

**Supplemental Table 1    The primary antibodies used in this study**

| <b>Antigen</b>                  | <b>Species</b> | <b>Company (catalog number)</b>            | <b>Dilution</b> |
|---------------------------------|----------------|--------------------------------------------|-----------------|
| <b>CK19</b>                     | <b>rabbit</b>  | <b>Abcam (ab52625)</b>                     | <b>1/250</b>    |
| <b>AFP</b>                      | <b>mouse</b>   | <b>Cell Signaling (#3903)</b>              | <b>1/100</b>    |
| <b>c/EBP<math>\beta</math></b>  | <b>rabbit</b>  | <b>Santa Cruz Biotechnology (sc-150AC)</b> | <b>1/50</b>     |
| <b>ALB (ELISA)</b>              | <b>goat</b>    | <b>Bethyl Laboratories (E80-129)</b>       |                 |
| <b>ALB (FCM)</b>                | <b>rabbit</b>  | <b>Abcam (ab135575)</b>                    | <b>1/40</b>     |
| <b>ALB (IHC)</b>                | <b>goat</b>    | <b>Santa Cruz Biotechnology (sc-46293)</b> | <b>1/200</b>    |
| <b>c/EBP<math>\alpha</math></b> | <b>rabbit</b>  | <b>Abcam (ab40764)</b>                     | <b>1/50</b>     |
| <b>HNF4<math>\alpha</math></b>  | <b>abcm</b>    | <b>Abcam (ab36175)</b>                     | <b>1/100</b>    |
| <b>TGFBR2</b>                   | <b>mouse</b>   | <b>Santa Cruz Biotechnology (sc-17799)</b> | <b>1/50</b>     |
| <b>ASGR1</b>                    | <b>goat</b>    | <b>Santa Cruz Biotechnology (sc-13467)</b> | <b>1/50</b>     |
| <b>CYP3A4</b>                   | <b>goat</b>    | <b>Santa Cruz Biotechnology (sc-27639)</b> | <b>1/200</b>    |
| <b>AQP1</b>                     | <b>mouse</b>   | <b>Abcam (ab9566)</b>                      | <b>1/40</b>     |
| <b>EpCAM</b>                    | <b>mouse</b>   | <b>Miltenyi Biotec (130-091-254)</b>       | <b>1/50</b>     |

**Supplemental Table 2    The secondary antibodies used in this study**

| <b>Antigen</b>    | <b>label</b>           | <b>Company</b>          | <b>Species</b> | <b>Dilution</b> |
|-------------------|------------------------|-------------------------|----------------|-----------------|
| <b>rabbit IgG</b> | <b>alexa fluor 488</b> | <b>Molecular Probes</b> | <b>goat</b>    | <b>1/1000</b>   |
| <b>rabbit IgG</b> | <b>alexa fluor 488</b> | <b>Molecular Probes</b> | <b>chicken</b> | <b>1/1000</b>   |
| <b>mouse IgG</b>  | <b>alexa fluor 488</b> | <b>Molecular Probes</b> | <b>rabbit</b>  | <b>1/1000</b>   |
| <b>goat IgG</b>   | <b>alexa fluor 488</b> | <b>Molecular Probes</b> | <b>rabbit</b>  | <b>1/1000</b>   |
| <b>rabbit IgG</b> | <b>alexa fluor 594</b> | <b>Molecular Probes</b> | <b>mouse</b>   | <b>1/1000</b>   |
| <b>goat IgG</b>   | <b>alexa fluor 594</b> | <b>Molecular Probes</b> | <b>mouse</b>   | <b>1/1000</b>   |
| <b>goat IgG</b>   | <b>alexa fluor 594</b> | <b>Molecular Probes</b> | <b>chicken</b> | <b>1/1000</b>   |
| <b>goat IgG</b>   | <b>alexa fluor 594</b> | <b>Molecular Probes</b> | <b>donkey</b>  | <b>1/1000</b>   |
| <b>mouse IgG</b>  | <b>alexa fluor 594</b> | <b>Molecular Probes</b> | <b>chicken</b> | <b>1/1000</b>   |

**Supplemental Table 3 The primers used for real-time RT-PCR in this study**

| Genes                    | Primers (forward/reverse; 5' to 3')            |
|--------------------------|------------------------------------------------|
| CK7                      | AGACGGAGTTGACAGAGCTG/GGATGGCCCGGTTTCATCTC      |
| CK19                     | CTCCCGCGACTACAGCCACT/TCAGCTCATCCAGCACCCCTG     |
| HES1                     | ATGGAGAAAAATTCCTCGTCCC/TTCAGAGCATCCAAAATCAGTGT |
| SOX9                     | TTTCCAAGACACAAACATGA/AAAGTCCAGTTTCTCGTTGA      |
| integrin $\beta$ 4       | GCAGCTTCCAAATCACAGAGG/CCAGATCATCGGACATGGAGTT   |
| TO                       | GGCAGCGAAGAAGACAAATC/TCGAACAGAATCCAACCTCCC     |
| $\alpha$ AT              | ACTGTCAACTTCGGGGACAC/CATGCCTAAACGCTTCATCA      |
| ALB                      | GCACAGAATCCTTGGTGAACAG/ATGGAAGGTGAATGTTTTCAGCA |
| TGFBR2                   | GGAAACTTGACTGCACCGTT/CTGCACATCGTCCTGTGG        |
| c/EBP $\alpha$           | TTCACATTGCACAAGGCACT/GAGGGACCGGAGTTATGACA      |
| c/EBP $\beta$            | CGTGTACACACGCGTTCAG/CTCTCTGCTTCTCCCTCTGC       |
| HNF6                     | CAAACCTGGAGCAAACCTCAA/TGTGTTGCCTCTATCCTTCCC    |
| HNF1 $\beta$             | ACCAAGCCGGTCTTCCATACT/GGTGTGTCATAGTCGTCGCC     |
| CYP2D6                   | CTTTCGCCCCAACGGTCTC/TTTGGGAAGCGTAGGACCTTG      |
| TTR                      | TCATCGTCTGCTCCTCCTCT/AGGTGTCATCAGCAGCCTTT      |
| HNF1 $\alpha$            | AACACCTCAACAAGGGCACTC/CCCCACTTGAAACGGTTCTT     |
| CYP3A4                   | AAGTCGCCTCGAAGATACACA/AAGGAGAGAACTGCTCGTG      |
| mouse $\alpha$ AT        | TTGCTCGACACAACATGGAAT/ACGTCCCAGTTTGACATCTCT    |
| mouse CYP7A1             | GCTGTGGTAGTGAGCTGTTG/GTTGTCCAAAGGAGGTTACCC     |
| mouse AQP1               | AGGCTTCAATTACCCACTGGA/CTTTGGGCCAGAGTAGCGAT     |
| mouse integrin $\beta$ 4 | AGAGCTGTACCGAGTGCATC/TGGTGTGATCTGGGTGTTCT      |

**Supplemental Table 4    The primers used for ChIP assay in this study**

|                      | Primers (forward/reverse; 5' to 3')            |
|----------------------|------------------------------------------------|
| c/EBP binding site A | TCACAACTTTCTAAGTCCCAATTTT/ACTGAGGCAGGGACTGTGTC |
| c/EBP binding site B | AACTGAAATGTCTTCCTTTTTTCAA/CAGGAGGAGTAGAGCCAGCA |
| c/EBP binding site C | GCCACATTGTGTTTTTCAGGA/ TTAGCCGAGAATGATGTCACC   |
| c/EBP binding site D | CCAGAGGGGCTGTACAGAATCA/ CCAGATTTGCCCAAGACATT   |
| c/EBP binding site E | TGCCTACTGGGTGCTAGAGG/AACCTTCAGAGACAGCGATCA     |
| β-actin              | CCGGCGGGGTCTTTGTCTGAGC/GGGCCGGCCGCGTTATTACCA   |
